# Supplementary material
Source: Springer Nature journal article supplement (https://www.springermedizin.de/resource/supplementary/12916_2012_702_MOESM4_ESM.pdf/9598608)
Supplement: MOESM4 [file 9598608]

|    | Order Mean | Value Before                 | Value After                  | Order Mean | <i>P</i> -value |
|----|------------|------------------------------|------------------------------|------------|-----------------|
| 1  | 2.98       | Honesty (aretological)       | Honesty (aretological)       | 3.90       | 0.000           |
| 2  | 3.80       | Respect (deontological)      | Respect (deontological)      | 4.30       | 0.000           |
| 3  | 5.14       | Veracity (deontological)     | Autonomy (utilitarian)       | 5.86       | 0.000           |
| 4  | 5.45       | Will to serve (aretological) | Will to serve (aretological) | 6.17       | 0.000           |
| 5  | 6.55       | Equality (deontological)     | Justice (dentological)       | 6.09       | 0.001           |
| 6  | 6.58       | Justice (dentological)       | Veracity (deontological)     | 6.31       | 0.000           |
| 7  | 6.86       | Tolerance (utilitarian)      | Equality (deontological)     | 6.98       | 0.000           |
| 8  | 7.60       | Liberty (utilitarian)        | Love (aretological)          | 7.18       | 0.001           |
| 9  | 7.76       | Love (aretological)          | Liberty (utilitarian)        | 6.98       | 0.000           |
| 10 | 8.00       | Autonomy (utilitarian)       | Tolerance (utilitarian)      | 8.32       | 0.000           |
| 11 | 8.08       | Interest (utilitarian)       | Charity (aretological)       | 9.97       | 0.000           |
| 12 | 9.29       | Charity (aretological)       | Interest (utilitarian)       | 10.21      | 0.000           |
| 13 | 9.65       | Fidelity (utilitarian)       | Fidelity (utilitarian)       | 10.42      | 0.000           |
| 14 | 11.44      | Purity ((aretological)       | Purity ((aretological)       | 12.27      | 0.000           |
| 15 | 12.80      | Beauty (aretological)        | Beauty (aretological)        | 13.48      | 0.000           |

Blue-Value position remains unchanged; White-Value position falls;  
Yellow-positions improves; Red-value position remarkably improves
